# Supplementary material for: MHC-class-II are expressed in a subpopulation of human neural stem cells in vitro in an IFNγ–independent fashion and during development
Source: PubMed Central journal article supplement (PMC4832187; doi:10.1038/srep24251), 2016-04-15
Supplement: srep24251-s1.pdf [file srep24251-s1.pdf]

# **MHC-class-II are expressed in a subpopulation of human neural stem cells *in vitro* in an IFN $\gamma$ -independent fashion and during development**

<sup>1</sup>Vagaska B, <sup>1</sup>New S.E.P, <sup>2</sup>Alvarez-Gonzalez C, <sup>3</sup>D'Acquisto F, <sup>4</sup>Gomez S.G, <sup>5</sup>Bulstrode N.W, <sup>2</sup>Madrigal A, <sup>1</sup>Ferretti P\*

<sup>1</sup> Stem Cells and Regenerative Medicine, UCL Institute of Child Health, London WC1N 1EH, UK, <sup>2</sup>Anthony Nolan Research Institute, London NW3 2QG, UK, and UCL Cancer Institute, <sup>3</sup>William Harvey Research Institute, Barts and The London School of Medicine, Queen Mary University of London, Charterhouse Square, London EC1M 6BQ, UK, <sup>4</sup>Anthony Nolan Cell Therapy Centre, Nottingham NG11 8NS, UK, <sup>5</sup>Department of Plastic Surgery, Great Ormond St. Hospital for Children NHS Trust, London WC1N 3JH, UK

***Movie – Legends***

***Supplementary Figures***

***Supplementary Tables***

## ***Movies – Legends***

***Movie 1.*** Interaction of T cell and hNSCs detected by time-lapse microscopy over 10 minutes. Images were taken every 10s at 5 frames/second.

***Movie 2.*** Interaction of T cell and hNSCs detected by time-lapse microscopy over 30 minutes. Images were taken every 10s at 5 frames/second.

***Movie 3.*** Interaction of T cell and hADSCs detected by time-lapse microscopy over 10 minutes. Images were taken every 10s at 5 frames/second.

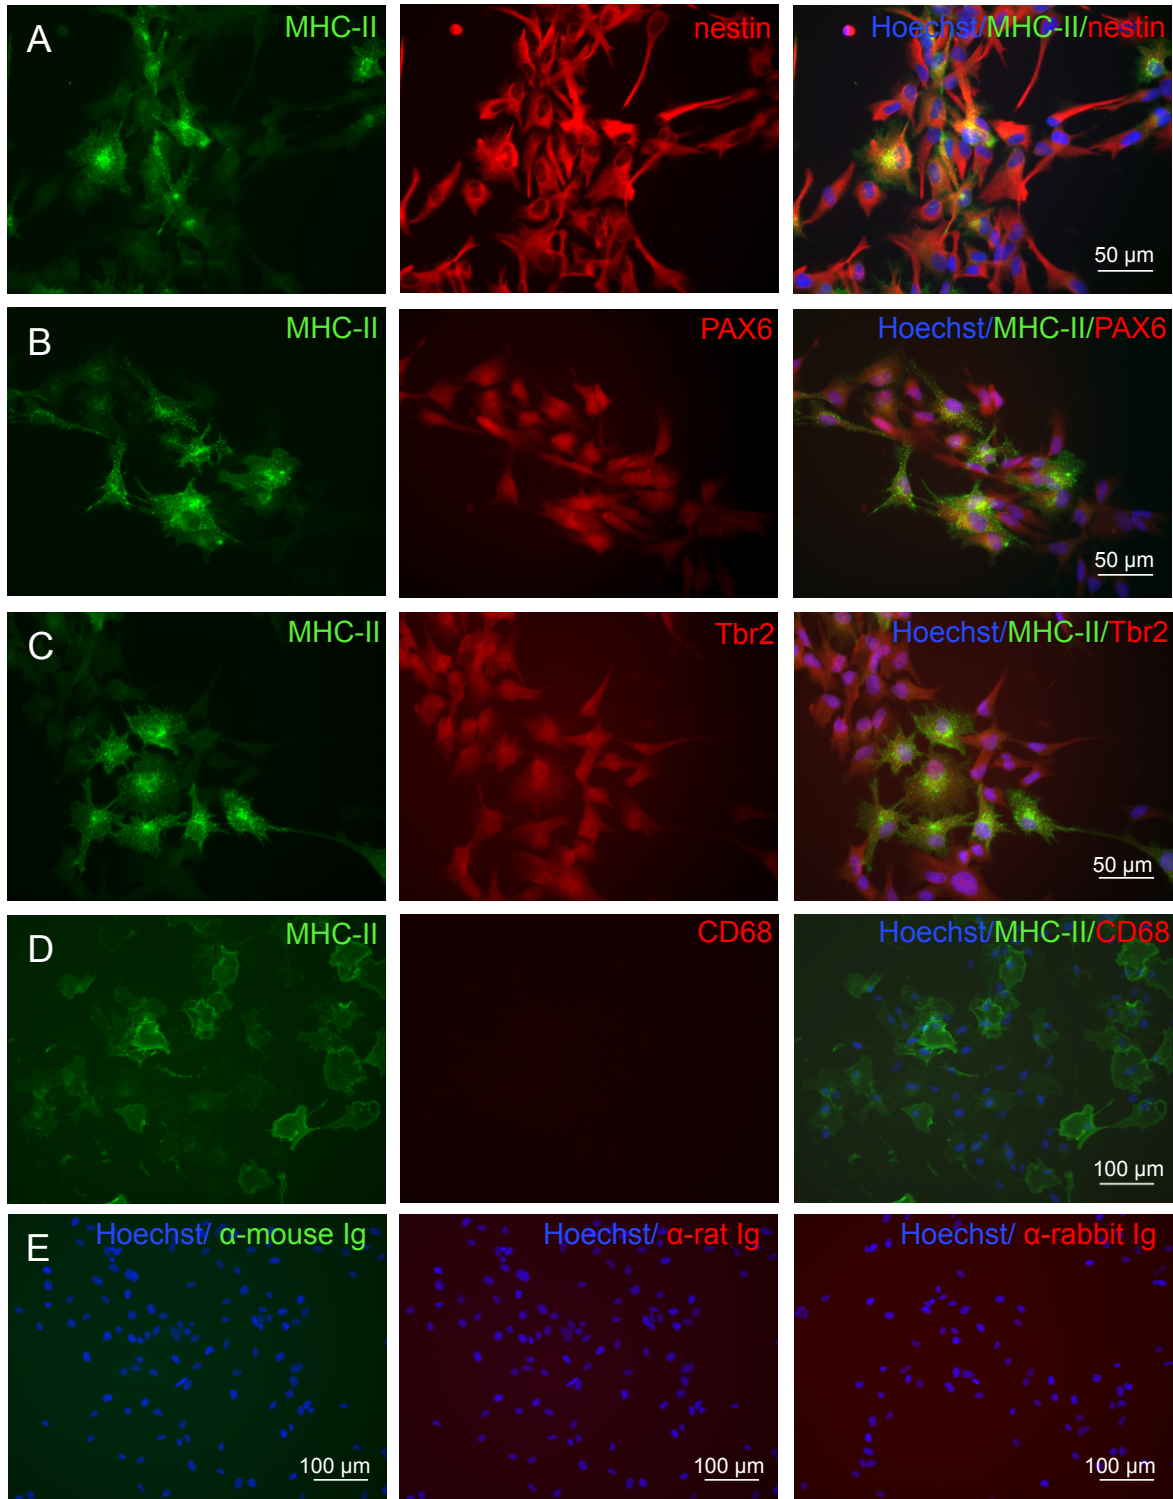

**Supplementary Figure S1. Immunofluorescence staining of MHC class II (MHC-II) in combination with microglial and neural stem cell markers in hNSCs *in vitro*.** **A-C)** hNSCs double-labeled for MHC-II and neural stem cell markers: (A) nestin, (B) PAX6 and (C) Tbr2. All cells are positive for the neural stem cell markers with a subset co-expressing MHC-II. Nuclei are counterstained with Hoechst dye (blue). **D)** hNSCs (Cs23) double-labeled for MHC-II and the microglial marker CD68; no CD68-positive cells are observed. **E)** No reactivity is detected in negative controls where primary antibodies are omitted.

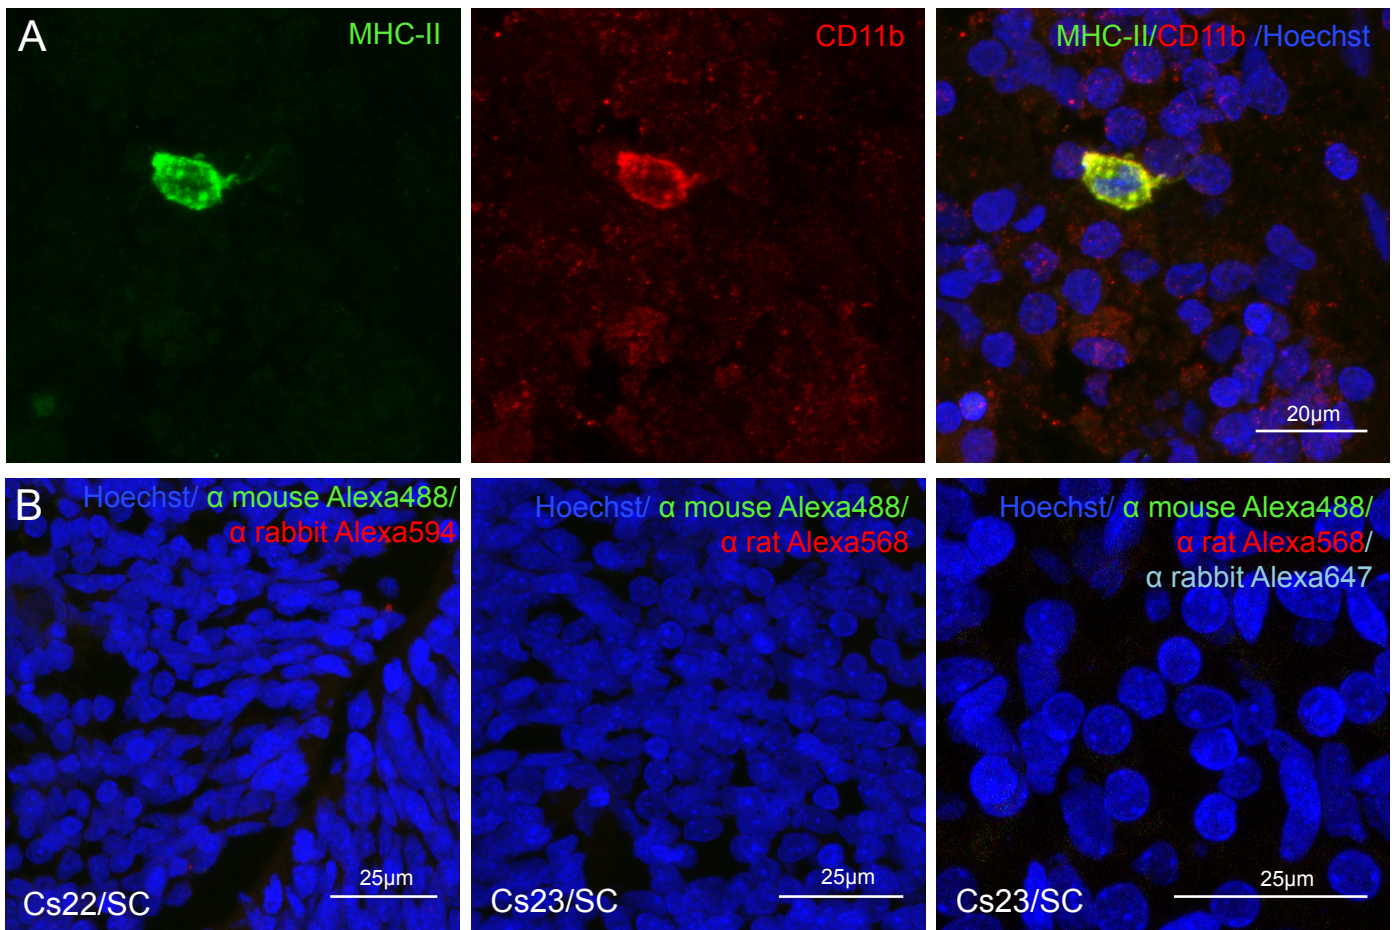

**Supplementary Figure S2. Detection of MHC class II (MHC-II) and microglial marker CD11b expression in dorsal root ganglia.** Cs22 dorsal root ganglion double-stained for MHC-II and CD11b. Note the double-labelled cell within the ganglion. **B)** Negative controls of immunohistochemical stainings (no primary antibody). Nuclei are counterstained with Hoechst dye (blue).

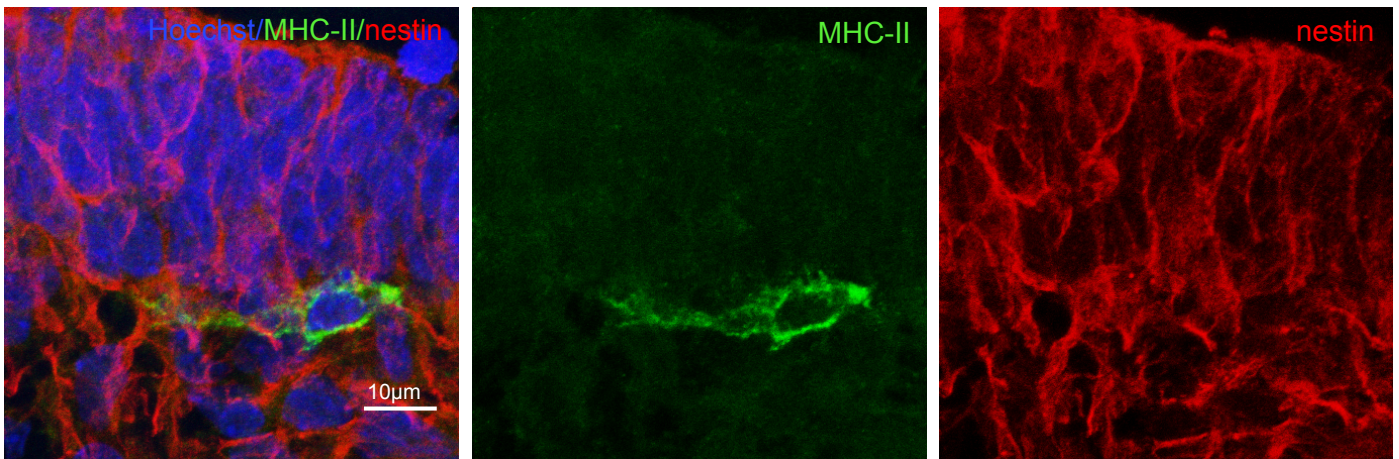

**Supplementary Figure S3. Detection of MHC class II and neural marker nestin in human fetal CNS by immunofluorescence.** Nestin expression is detected in MHC-II expressing cells adjacent to ventricular germinal layer. Nuclei are counterstained with Hoechst dye (blue).

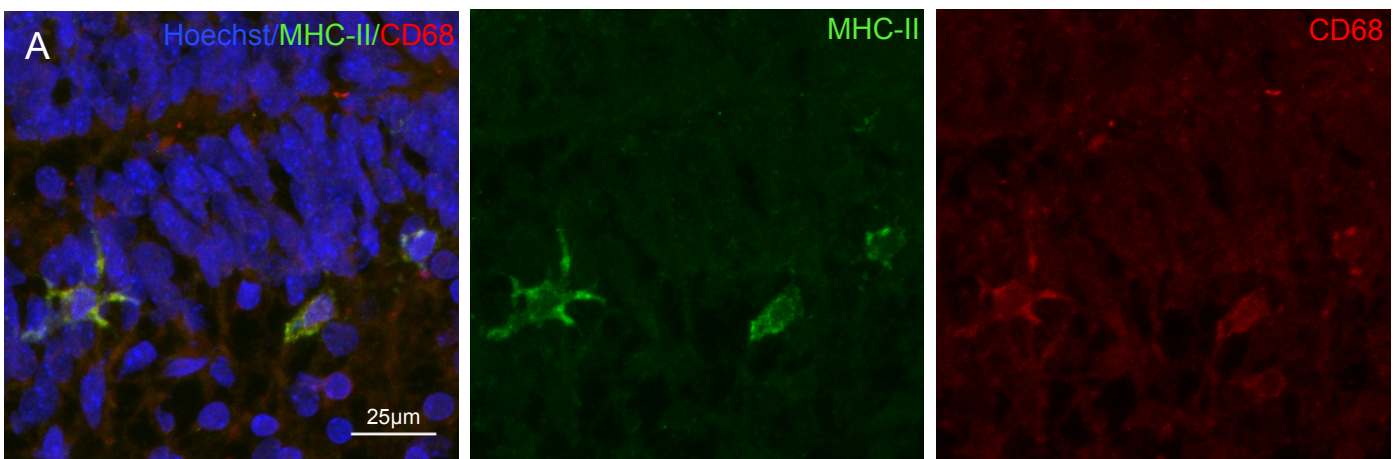

**Supplementary Figure S4. MHC class II (MHC-II) and microglial marker CD68 expression in human fetal CNS detected by immunofluorescence.** Double-staining for MHC-II and CD68 in spinal cord from embryos at Carnegie stages 22.

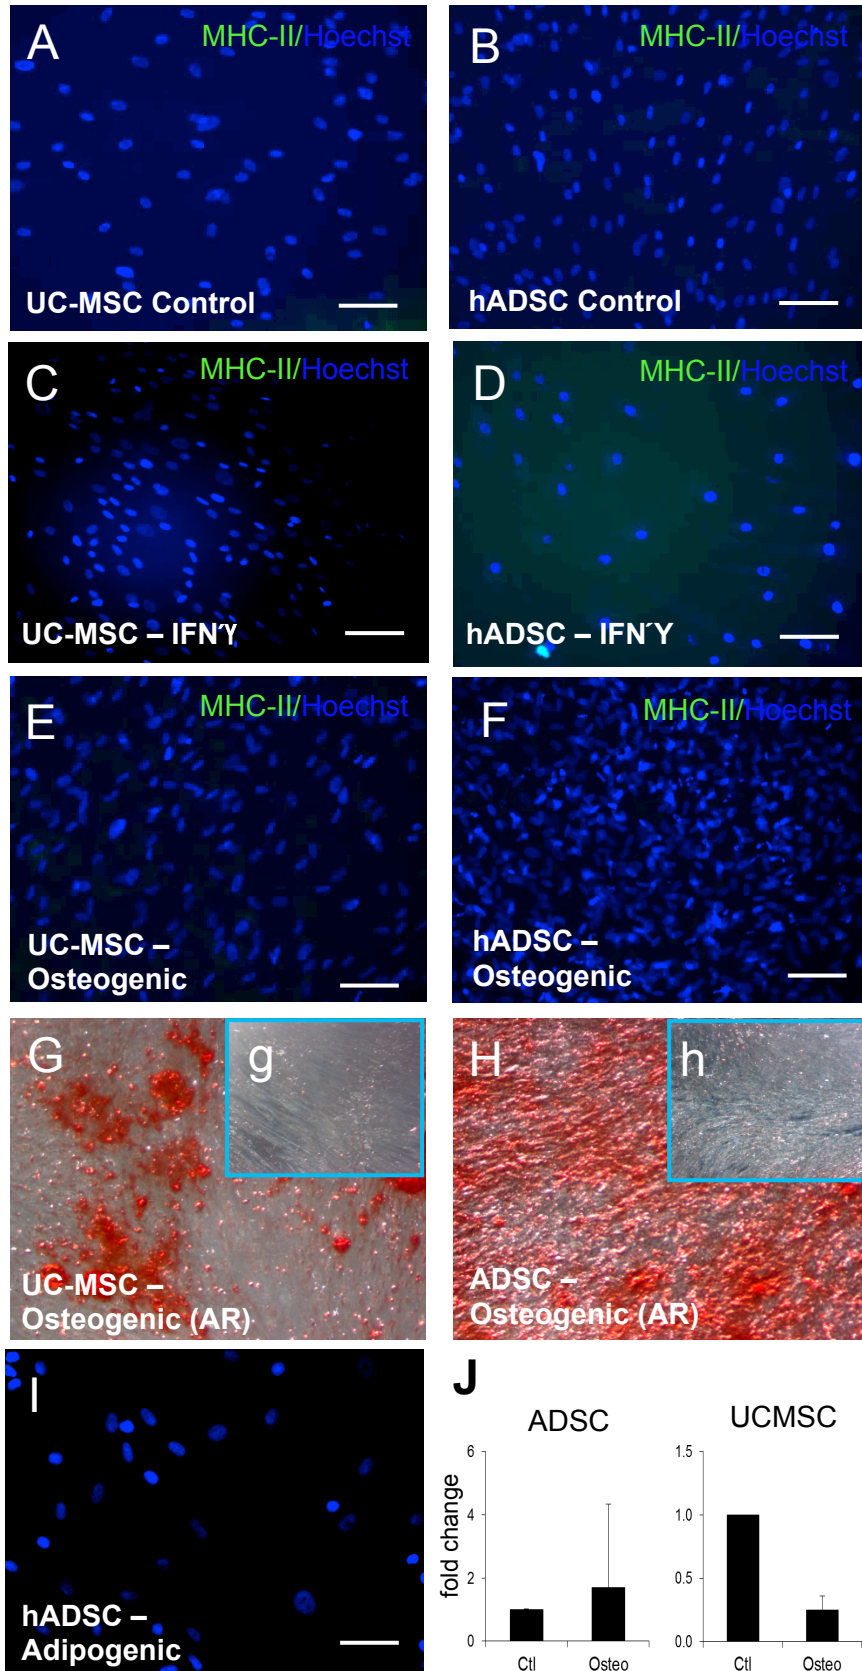

**Supplementary Figure S5. Effect of IFN $\gamma$  stimulation on MHC class II expression in undifferentiated ADSC and UC-MSC lines and following differentiation detected by immunocytochemistry. A-F) Note that all IFN $\gamma$  treatment does not induce MHC-II expression in either control or differentiated cells. G-H) Alizarin red staining demonstrating occurrence of osteogenic differentiation; the insert shows staining in undifferentiated control groups I) No MHC-II positive cells are detected following ADSC adipogenic differentiation J) Expression of MHC-II in ADSCs and UC-MSCs following osteogenic differentiation detected by RT-qPCR. No increase in HLA-DRA subtype transcripts is observed following osteogenic differentiation in either ADSCs or UC-MSCs, where they appear to have decreased. Scale bars are 100 $\mu$ m.**

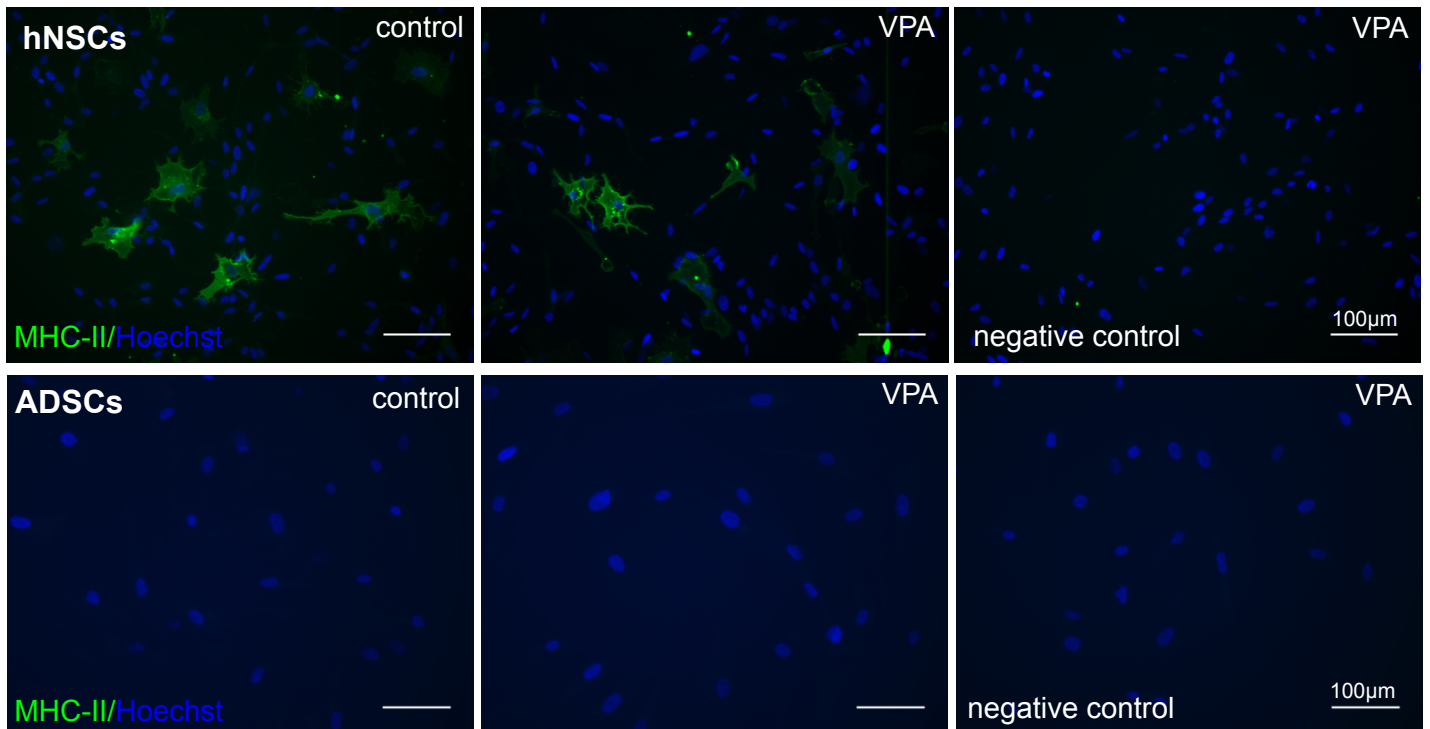

**Supplementary Figure S6. Effect of valproic acid (VPA) on MHC-II expression in undifferentiated hNSCs (upper row) and ADSCs (lower row).** MHC-II expression assessed by immunofluorescence in control cells and cells treated with 2 mM valproic acid (VPA) for 24 hours (this is the VPA concentration used in neuronal differentiation experiments; a 24 hour treatment with histone deacetylase inhibitors has been shown to be sufficient to induce surface expression of MHC-II in other systems). MHC-II reactivity is clearly detected in hNSCs, but not in ADSCs. VPA treatment has no observable effect on MHC-II expression in either cell type. No staining is present in negative controls (no primary antibody). All images are at the same magnification.

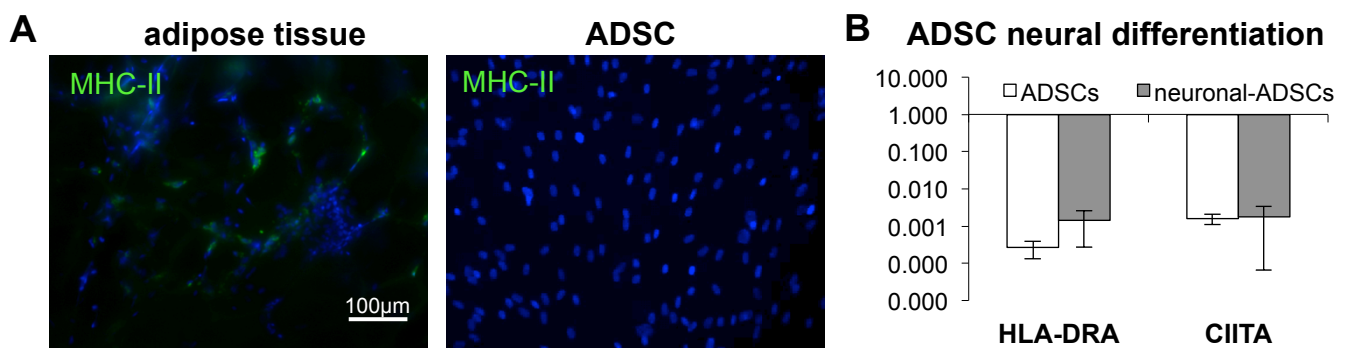

**Supplementary Figure S7. MHC class II expression in adipose tissue and ADSCs and following ADSC neuronal differentiation.** **A)** Detection of MHC-II proteins by immunocytochemistry in a section of adipose tissue and cultured ADSCs. A few MHC-II positive cells are present in the fat tissue but not in ADSC cultures. **B)** Detection of MHC-II and CIITA transcripts by RT-qPCR (expression normalized to hNSCs). MHC-II and CIITA mRNA levels are much lower than in hNSCs and do not change following neuronal differentiation induction.



## Supplementary Tables

**Supplementary Table S1.** Quantification of the MHC-II/CD11b and MHC-II/SOX2 double-positive cells and MHC-II/SOX2/CD11b triple-positive cells in the developing human foetal CNS.

|                                      | MHC-II+/CD11b+ <sup>¶</sup> | SOX2+/MHC-II+ | CD11b+ and SOX2+/MHC-II+ |
|--------------------------------------|-----------------------------|---------------|--------------------------|
| <b>% of cells</b>                    | 92.5                        | 87.9          | 88.2                     |
| <b>SD (%)</b>                        | 7.09                        | 4.87          | 5.57                     |
| <b>Total number of counted cells</b> | 88                          | 76            | 69                       |

Numbers indicate double/ triple positive cells in spinal cords from developing embryos at Carnegie stages 22 and 23 expressed as mean percentage of CD11b-positive <sup>¶</sup> or MHC-II-positive cells (n=5 different embryos).

**Supplementary Table S2.** Induction of MHC-II by IFN $\gamma$  and upon differentiation assessed by immunocytochemistry.

| Cell type                    | control          | IFN $\gamma$ treated |
|------------------------------|------------------|----------------------|
| <b>hNSC</b>                  |                  |                      |
| undifferentiated             | ( $\checkmark$ ) | $\checkmark$         |
| neuronal differentiation     | $\checkmark$     | ND                   |
| astrocytic differentiation   | -                | $\checkmark$         |
| <b>ADSC</b>                  |                  |                      |
| undifferentiated             | -                | -                    |
| osteogenic differentiation   | -                | -                    |
| adipogenic differentiation   | -                | -                    |
| neuronal differentiation     | -                | -                    |
| <b>UC-MSC</b>                |                  |                      |
| undifferentiated             | -                | -                    |
| osteogenic differentiation   | -                | -                    |
| <b>Chondroblasts</b>         |                  |                      |
| undifferentiated             | -                | -                    |
| chondrogenic differentiation | -                | -                    |

ND: not done, as MHC-class II expression is high in differentiated cells.

**Supplementary Table S3.** Primary and secondary antibodies used in this study for immunohistochemistry / immunocytochemistry.

| Antibody                         | Species | Types    | Dilution | Source                      |
|----------------------------------|---------|----------|----------|-----------------------------|
| <b>Primary</b>                   |         |          |          |                             |
| HLA-DR, -DP, -DQ-FITC            | Mouse   | IgG2a    | 1:5      | BD Pharmingen               |
| HLA-A, -B, -C-PE                 | Mouse   | IgG1     | 1:5      | BD Pharmingen               |
| IgG1, k Isotype -FITC Control    | Mouse   | IgG1, k  | 1:5      | BD Pharmingen               |
| IgG1, k Isotype-PE Control       | Mouse   | IgG1, k  | 1:5      | BD Pharmingen               |
| IgG2a, k Isotype-FITC Control    | Mouse   | IgG2a, k | 1:5      | BD Pharmingen               |
| MAP2                             | Mouse   | IgG      | 1:100    | Life Technologies           |
| GFAP                             | Rabbit  | IgG      | 1:1000   | Millipore                   |
| SOX2                             | Rabbit  | IgG      | 1:200    | Millipore                   |
| Doublecortin                     | Rabbit  | IgG      | 1:200    | Cell Signaling              |
| Nestin                           | Rabbit  | IgG      | 1:500    | Millipore                   |
| PAX6                             | Rabbit  | IgG      | 1:100    | BioLegend                   |
| Tbr2                             | Rabbit  | IgG      | 1:500    | Abcam                       |
| CD68                             | Rabbit  | IgG      | 1:100    | Santa Cruz                  |
| CD11b                            | Rat     | IgG      | 1:100    | Abcam                       |
| CD45                             | Mouse   | IgG1     | 1:15     | BD Pharmingen               |
| CD4                              | Mouse   | IgG1     | 1:15     | BD Pharmingen               |
| CD8                              | Mouse   | IgG1     | 1:15     | BD Pharmingen               |
| <b>Secondary</b>                 |         |          |          |                             |
| anti-mouse IgG Alexa Fluor® 488  | Donkey  | IgG      | 1:400    | Molecular probe, Invitrogen |
| anti-rabbit IgG Alexa Fluor® 594 | Donkey  | IgG      | 1:400    | Molecular probe, Invitrogen |
| anti-rabbit IgG Alexa Fluor® 647 | Goat    | IgG      | 1:400    | Molecular probe, Invitrogen |
| anti-rat IgG Alexa Fluor® 568    | Goat    | IgG      | 1:400    | Molecular probe, Invitrogen |

All antibodies were diluted in the blocking/permeabilising buffer (10% FBS, 3% BSA, and 0.5% Triton-X100 in PBS) and cells extensively washed with PBS after antibody incubation.

**Supplementary Table S4.** Primers used for RT-qPCR

| <b>Gene</b>             | <b>Primers (5'-3')</b>                                       |
|-------------------------|--------------------------------------------------------------|
| GAPDH                   | For TGATGACATCAAGAAGGTGGTGAAG<br>Rev TCCTTGGAGGCCATGTGGGCCAT |
| HLA -DRA                | For AGACAAGTTCACCCCACCAG<br>Rev AGCATCAAACCTCCAGTGCT         |
| CIITA                   | For CCGACACAGACACCATCAAC<br>Rev TTTTCTGCCCAACTTCTGCT         |
| IFN $\gamma$ receptor 1 | For TGAATCGCTAACTGGCACT<br>Rev TGCTGTATGCCGAGATGGAAA         |
| IFN $\gamma$ receptor 2 | For GTAAATGGTTCACGGCCGAC<br>Rev CCCGACAGTCACATTCCGA          |
| IFN $\gamma$            | For TGACCAGAGCATCCAAAAGA<br>Rev CTCTTCGACCTCGAAACAGC         |
